# Supplementary material
Source: publisher site journal article supplement (https://www.dovepress.com/get_supplementary_file.php?f=349950.docx)
Supplement: Supplementary file 1 [file get_supplementary_file.php]

Supplementary Table 1 Bioactive ingredients of WMW

| **Number** | **Molecule ID** | **Molecule name** | **[MW](https://tcmspw.com/tcmspsearch.php?qr=Mume Fructus&qsr=herb_en_name&token=5841ceab7b04228318bea045c0bf38b3)** | **[AlogP](https://tcmspw.com/tcmspsearch.php?qr=Mume Fructus&qsr=herb_en_name&token=5841ceab7b04228318bea045c0bf38b3)** | **[Hdon](https://tcmspw.com/tcmspsearch.php?qr=Mume Fructus&qsr=herb_en_name&token=5841ceab7b04228318bea045c0bf38b3)** | **[Hacc](https://tcmspw.com/tcmspsearch.php?qr=Mume Fructus&qsr=herb_en_name&token=5841ceab7b04228318bea045c0bf38b3)** | **[OB (%)](https://tcmspw.com/tcmspsearch.php?qr=Mume Fructus&qsr=herb_en_name&token=5841ceab7b04228318bea045c0bf38b3)** | **[Caco-2](https://tcmspw.com/tcmspsearch.php?qr=Mume Fructus&qsr=herb_en_name&token=5841ceab7b04228318bea045c0bf38b3)** | **[BBB](https://tcmspw.com/tcmspsearch.php?qr=Mume Fructus&qsr=herb_en_name&token=5841ceab7b04228318bea045c0bf38b3)** | **[DL](https://tcmspw.com/tcmspsearch.php?qr=Mume Fructus&qsr=herb_en_name&token=5841ceab7b04228318bea045c0bf38b3)** | **[FASA-](https://tcmspw.com/tcmspsearch.php?qr=Mume Fructus&qsr=herb_en_name&token=5841ceab7b04228318bea045c0bf38b3)** | **[HL](https://tcmspw.com/tcmspsearch.php?qr=Mume Fructus&qsr=herb_en_name&token=5841ceab7b04228318bea045c0bf38b3)** | **Source** |
| --- | --- | --- | --- | --- | --- | --- | --- | --- | --- | --- | --- | --- | --- |
| 1 | MOL001040 | (2R)-5,7-dihydroxy-2-(4-hydroxyphenyl)chroman-4-one | 272.27 | 2.3 | 3 | 5 | 42.36 | 0.38 | -0.48 | 0.21 | 0.41 | 16.83 | Mume Fructus |
| 2 | MOL005043 | campest-5-en-3beta-ol | 400.76 | 7.63 | 1 | 1 | 37.58 | 1.32 | 0.94 | 0.71 | 0.23 | 4.43 | Mume Fructus |
| 3 | MOL008601 | Methyl arachidonate | 318.55 | 6.67 | 0 | 2 | 46.9 | 1.48 | 0.93 | 0.23 | 0.26 | 4.15 | Mume Fructus |
| 4 | MOL000953 | CLR | 386.73 | 7.38 | 1 | 1 | 37.87 | 1.43 | 1.13 | 0.68 | 0.2 | 4.52 | Mume Fructus |
| 5 | MOL002897 | epiberberine | 336.39 | 3.45 | 0 | 4 | 43.09 | 1.17 | 0.4 | 0.78 | 0.19 | 6.1 | Coptidis Rhizoma |
| 6 | MOL002903 | (R)-Canadine | 339.42 | 3.4 | 0 | 5 | 55.37 | 1.04 | 0.57 | 0.77 | 0.2 | 6.41 | Coptidis Rhizoma |
| 7 | MOL002904 | Berlambine | 351.38 | 2.49 | 0 | 6 | 36.68 | 0.97 | 0.17 | 0.82 | 0.28 | 7.33 | Coptidis Rhizoma |
| 8 | MOL002907 | Corchoroside A_qt | 404.55 | 1.34 | 3 | 6 | 104.95 | -0.91 | -1.31 | 0.78 | 0.29 | 6.68 | Coptidis Rhizoma |
| 9 | MOL008647 | Moupinamide | 313.38 | 2.86 | 3 | 5 | 86.71 | 0.55 | -0.51 | 0.26 | 0.33 | 3.71 | Coptidis Rhizoma, Phellodendri Chinrnsis Cortex |
| 10 | MOL001454 | berberine | 336.39 | 3.45 | 0 | 4 | 36.86 | 1.24 | 0.57 | 0.78 | 0.19 | 6.57 | Phellodendri Chinrnsis Cortex, Coptidis Rhizoma |
| 11 | MOL001458 | coptisine | 320.34 | 3.25 | 0 | 4 | 30.67 | 1.21 | 0.32 | 0.86 | 0.26 | 9.33 | Phellodendri Chinrnsis Cortex |
| 12 | MOL002636 | Kihadalactone A | 512.7 | 3.96 | 0 | 7 | 34.21 | 0.19 | -0.51 | 0.82 | 0.29 | -6.27 | Phellodendri Chinrnsis Cortex |
| 13 | MOL013352 | Obacunone | 454.56 | 2.68 | 0 | 7 | 43.29 | 0.01 | -0.43 | 0.77 | 0.31 | -13.04 | Phellodendri Chinrnsis Cortex, Coptidis Rhizoma |
| 14 | MOL002641 | Phellavin_qt | 374.42 | 2.51 | 5 | 7 | 35.86 | -0.41 | -1.32 | 0.44 | 0.33 | 15.81 | Phellodendri Chinrnsis Cortex |
| 15 | MOL002643 | delta 7-stigmastenol | 414.79 | 8.08 | 1 | 1 | 37.42 | 1.3 | 0.83 | 0.75 | 0.22 | 5.27 | Phellodendri Chinrnsis Cortex |
| 16 | MOL002644 | Phellopterin | 300.33 | 3.64 | 0 | 5 | 40.19 | 0.98 | 0.48 | 0.28 | 0.24 | -1.64 | Phellodendri Chinrnsis Cortex |
| 17 | MOL002651 | Dehydrotanshinone II A | 292.35 | 4.22 | 0 | 3 | 43.76 | 1.02 | 0.52 | 0.4 | 0.33 | 23.71 | Phellodendri Chinrnsis Cortex |
| 18 | MOL002652 | delta7-Dehydrosophoramine | 242.35 | 1.09 | 0 | 3 | 54.45 | 0.99 | 0.75 | 0.25 | 0.22 | 5.52 | Phellodendri Chinrnsis Cortex |
| 19 | MOL002656 | dihydroniloticin | 458.8 | 5.66 | 2 | 3 | 36.43 | 0.65 | 0.03 | 0.81 | 0.25 | 7.04 | Phellodendri Chinrnsis Cortex |
| 20 | MOL002659 | kihadanin A | 486.56 | 1.76 | 1 | 9 | 31.6 | -0.93 | -1.36 | 0.7 | 0.38 | 2.68 | Phellodendri Chinrnsis Cortex |
| 21 | MOL002660 | niloticin | 456.78 | 5.62 | 1 | 3 | 41.41 | 0.54 | -0.2 | 0.82 | 0.27 | 5.19 | Phellodendri Chinrnsis Cortex |
| 22 | MOL002662 | rutaecarpine | 287.34 | 3.36 | 1 | 3 | 40.3 | 1.13 | 0.71 | 0.6 | 0.33 | 8.21 | Phellodendri Chinrnsis Cortex |
| 23 | MOL002663 | Skimmianin | 259.28 | 2.33 | 0 | 5 | 40.14 | 1.26 | 1.1 | 0.2 | 0.14 | -2.43 | Phellodendri Chinrnsis Cortex, Zanthoxyli Pericarpium |
| 24 | MOL002666 | Chelerythrine | 332.37 | 4.29 | 0 | 4 | 34.18 | 1.24 | 0.28 | 0.78 | 0.36 | 6.32 | Phellodendri Chinrnsis Cortex |
| 25 | MOL002668 | Worenine | 334.37 | 3.73 | 0 | 4 | 45.83 | 1.22 | 0.24 | 0.87 | 0.27 | 8.41 | Phellodendri Chinrnsis Cortex, Coptidis Rhizoma |
| 26 | MOL002670 | Cavidine | 353.45 | 3.72 | 0 | 5 | 35.64 | 1.08 | 0.63 | 0.81 | 0 | 5.78 | Phellodendri Chinrnsis Cortex |
| 27 | MOL002671 | Candletoxin A | 608.79 | 3.63 | 2 | 9 | 31.81 | -0.39 | -1.24 | 0.69 | 0.32 | -0.36 | Phellodendri Chinrnsis Cortex |
| 28 | MOL002672 | Hericenone H | 580.88 | 9.95 | 0 | 6 | 39 | 0.8 | 0.16 | 0.63 | 0.22 | 3.62 | Phellodendri Chinrnsis Cortex |
| 29 | MOL002673 | Hispidone | 472.78 | 4.46 | 2 | 4 | 36.18 | 0.12 | -0.72 | 0.83 | 0.25 | 5.08 | Phellodendri Chinrnsis Cortex |
| 30 | MOL000622 | Magnograndiolide | 266.37 | 1.18 | 2 | 4 | 63.71 | 0.02 | -0.24 | 0.19 | 0.3 | 3.17 | Phellodendri Chinrnsis Cortex, Coptidis Rhizoma |
| 31 | MOL000762 | Palmidin A | 510.52 | 4.52 | 6 | 8 | 35.36 | -0.38 | -1.47 | 0.65 | 0.39 | 33.17 | Phellodendri Chinrnsis Cortex, Coptidis Rhizoma |
| 32 | MOL000785 | palmatine | 352.44 | 3.65 | 0 | 4 | 64.6 | 1.33 | 0.37 | 0.65 | 0.13 | 2.25 | Phellodendri Chinrnsis Cortex, Coptidis Rhizoma |
| 33 | MOL000790 | Isocorypalmine | 341.44 | 3.35 | 1 | 5 | 35.77 | 0.85 | 0.43 | 0.59 | 0.21 | 2.47 | Phellodendri Chinrnsis Cortex |
| 34 | MOL000098 | quercetin | 302.25 | 1.5 | 5 | 7 | 46.43 | 0.05 | -0.77 | 0.28 | 0.38 | 14.4 | Phellodendri Chinrnsis Cortex, Coptidis Rhizoma, Mume Fructus, Zanthoxyli Pericarpium |
| 35 | MOL001131 | phellamurin_qt | 356.4 | 3.61 | 4 | 6 | 56.6 | 0.14 | -0.5 | 0.39 | 0.38 | 14.89 | Phellodendri Chinrnsis Cortex |
| 36 | MOL001455 | (S)-Canadine | 339.42 | 3.4 | 0 | 5 | 53.83 | 1.01 | 0.64 | 0.77 | 0.19 | 6.56 | Phellodendri Chinrnsis Cortex |
| 37 | MOL001771 | poriferast-5-en-3beta-ol | 414.79 | 8.08 | 1 | 1 | 36.91 | 1.45 | 1.14 | 0.75 | 0 | 5.07 | Phellodendri Chinrnsis Cortex |
| 38 | MOL002894 | berberrubine | 322.36 | 3.2 | 1 | 4 | 35.74 | 1.07 | 0.17 | 0.73 | 0.24 | 6.46 | Phellodendri Chinrnsis Cortex, Coptidis Rhizoma |
| 39 | MOL005438 | campesterol | 400.76 | 7.63 | 1 | 1 | 37.58 | 1.34 | 0.95 | 0.71 | 0.22 | 4.83 | Phellodendri Chinrnsis Cortex |
| 40 | MOL006392 | dihydroniloticin | 458.8 | 5.66 | 2 | 3 | 36.43 | 0.64 | 0.1 | 0.82 | 0.24 | 6.46 | Phellodendri Chinrnsis Cortex |
| 41 | MOL006401 | melianone | 470.76 | 4.76 | 1 | 4 | 40.53 | 0.4 | -0.31 | 0.78 | 0.27 | 6.09 | Phellodendri Chinrnsis Cortex |
| 42 | MOL006413 | phellochin | 488.83 | 5.26 | 2 | 4 | 35.41 | 0.47 | -0.01 | 0.82 | 0.24 | 6.64 | Phellodendri Chinrnsis Cortex |
| 43 | MOL006422 | thalifendine | 322.36 | 3.2 | 1 | 4 | 44.41 | 1.12 | 0.21 | 0.73 | 0.22 | 5.99 | Phellodendri Chinrnsis Cortex |
| 44 | MOL002879 | Diop | 390.62 | 7.44 | 0 | 4 | 43.59 | 0.79 | 0.26 | 0.39 | 0.28 | 3.6 | Panax Ginseng C. A. Mey. |
| 45 | MOL000449 | Stigmasterol | 412.77 | 7.64 | 1 | 1 | 43.83 | 1.44 | 1 | 0.76 | 0.22 | 5.57 | Panax Ginseng C. A. Mey., Mume Fructus, Phellodendri Chinrnsis Cortex, Cinnamomi Ramulus |
| 46 | MOL003648 | Inermin | 284.28 | 2.44 | 1 | 5 | 65.83 | 0.91 | 0.36 | 0.54 | 0.3 | 11.73 | Panax Ginseng C. A. Mey. |
| 47 | MOL004492 | Chrysanthemaxanthin | 584.96 | 8.24 | 2 | 3 | 38.72 | 0.51 | -0.98 | 0.58 | 0.3 | 17.47 | Panax Ginseng C. A. Mey. |
| 48 | MOL005308 | Aposiopolamine | 271.34 | 1.39 | 1 | 4 | 66.65 | 0.66 | 0.4 | 0.22 | 0.35 | 3.54 | Panax Ginseng C. A. Mey. |
| 49 | MOL005314 | Celabenzine | 379.55 | 2.29 | 2 | 5 | 101.88 | 0.77 | 0.05 | 0.49 | 0.35 | 8.15 | Panax Ginseng C. A. Mey. |
| 50 | MOL005317 | Deoxyharringtonine | 515.66 | 3.13 | 1 | 9 | 39.27 | 0.19 | -0.25 | 0.81 | 0.23 | 7.9 | Panax Ginseng C. A. Mey. |
| 51 | MOL005318 | Dianthramine | 289.26 | 2.05 | 5 | 7 | 40.45 | -0.23 | -0.97 | 0.2 | 0.42 | 5.14 | Panax Ginseng C. A. Mey. |
| 52 | MOL005320 | arachidonate | 304.52 | 6.41 | 1 | 2 | 45.57 | 1.27 | 0.58 | 0.2 | 0.26 | 7.56 | Panax Ginseng C. A. Mey. |
| 53 | MOL005321 | Frutinone A | 264.24 | 2.7 | 0 | 4 | 65.9 | 0.89 | 0.46 | 0.34 | 0.47 | 19.1 | Panax Ginseng C. A. Mey. |
| 54 | MOL005344 | ginsenoside rh2 | 622.98 | 4.04 | 6 | 8 | 36.32 | -0.51 | -1.38 | 0.56 | 0.24 | 11.08 | Panax Ginseng C. A. Mey. |
| 55 | MOL005348 | Ginsenoside-Rh4_qt | 458.8 | 5.59 | 3 | 3 | 31.11 | 0.5 | -0.18 | 0.78 | 0.25 | 6.97 | Panax Ginseng C. A. Mey. |
| 56 | MOL005356 | Girinimbin | 263.36 | 4.6 | 1 | 1 | 61.22 | 1.72 | 1.22 | 0.31 | 0.33 | 8.17 | Panax Ginseng C. A. Mey. |
| 57 | MOL005357 | Gomisin B | 514.62 | 2.73 | 1 | 9 | 31.99 | 0.6 | 0.18 | 0.83 | 0.19 | 7.81 | Panax Ginseng C. A. Mey. |
| 58 | MOL005360 | malkangunin | 432.56 | 1.84 | 2 | 7 | 57.71 | 0.22 | -0.17 | 0.63 | 0.3 | 4.09 | Panax Ginseng C. A. Mey. |
| 59 | MOL005376 | Panaxadiol | 460.82 | 5.46 | 2 | 3 | 33.09 | 0.82 | 0.23 | 0.79 | 0.22 | 6.34 | Panax Ginseng C. A. Mey. |
| 60 | MOL005384 | suchilactone | 368.41 | 3.73 | 0 | 6 | 57.52 | 0.82 | 0.28 | 0.56 | 0.28 | 9.03 | Panax Ginseng C. A. Mey. |
| 61 | MOL005399 | alexandrin_qt | 414.79 | 8.08 | 1 | 1 | 36.91 | 1.3 | 0.88 | 0.75 | 0.23 | 5.53 | Panax Ginseng C. A. Mey. |
| 62 | MOL005401 | ginsenoside Rg5_qt | 442.8 | 6.8 | 2 | 2 | 39.56 | 0.88 | 0.21 | 0.79 | 0.24 | 5.65 | Panax Ginseng C. A. Mey. |
| 63 | MOL000787 | Fumarine | 353.4 | 2.95 | 0 | 6 | 59.26 | 0.56 | -0.13 | 0.83 | 0.3 | 23.46 | Panax Ginseng C. A. Mey., Phellodendri Chinrnsis Cortex |
| 64 | MOL001736 | (-)-taxifolin | 304.27 | 1.49 | 5 | 7 | 60.51 | -0.24 | -1.02 | 0.27 | 0.41 | 14.37 | Cinnamomi Ramulus |
| 65 | MOL000492 | (+)-catechin | 290.29 | 1.92 | 5 | 6 | 54.83 | -0.03 | -0.73 | 0.24 | 0 | 0.61 | Cinnamomi Ramulus |
| 66 | MOL000073 | ent-Epicatechin | 290.29 | 1.92 | 5 | 6 | 48.96 | 0.02 | -0.64 | 0.24 | 0.34 | 0.63 | Cinnamomi Ramulus |
| 67 | MOL004576 | taxifolin | 304.27 | 1.49 | 5 | 7 | 57.84 | -0.23 | -0.8 | 0.27 | 0.39 | 14.41 | Cinnamomi Ramulus |
| 68 | MOL011169 | Peroxyergosterol | 428.72 | 6.73 | 1 | 3 | 44.39 | 0.86 | 0.43 | 0.82 | 0.24 | 4.06 | Cinnamomi Ramulus |
| 69 | MOL012140 | 4,9-dimethoxy-1-vinyl-$b-carboline | 254.31 | 3.38 | 0 | 3 | 65.3 | 1.21 | 0.72 | 0.19 | 0.27 | 9.85 | Asari Radix Et Rhizoma |
| 70 | MOL012141 | Caribine | 326.43 | 1.22 | 2 | 5 | 37.06 | 0.34 | -0.15 | 0.83 | 0.23 | 10.44 | Asari Radix Et Rhizoma |
| 71 | MOL001460 | Cryptopin | 369.45 | 3.15 | 0 | 6 | 78.74 | 0.79 | 0.41 | 0.72 | 0.21 | 21.25 | Asari Radix Et Rhizoma |
| 72 | MOL001558 | sesamin | 354.38 | 2.24 | 0 | 6 | 56.55 | 0.75 | -0.08 | 0.83 | 0.31 | 13.44 | Asari Radix Et Rhizoma |
| 73 | MOL002962 | (3S)-7-hydroxy-3-(2,3,4-trimethoxyphenyl)chroman-4-one | 330.36 | 2.67 | 1 | 6 | 48.23 | 0.62 | 0.01 | 0.33 | 0.24 | 16.64 | Asari Radix Et Rhizoma |
| 74 | MOL000422 | kaempferol | 286.25 | 1.77 | 4 | 6 | 41.88 | 0.26 | -0.55 | 0.24 | 0 | 14.74 | Asari Radix Et Rhizoma, Mume Fructus, Panax Ginseng C. A. Mey. |
| 75 | MOL009849 | ZINC05223929 | 354.38 | 2.24 | 0 | 6 | 31.57 | 0.73 | 0.12 | 0.83 | 0.3 | 14.12 | Asari Radix Et Rhizoma |
| 76 | MOL002464 | 1-Monolinolein | 354.59 | 5.59 | 2 | 4 | 37.18 | 0.32 | -0.32 | 0.3 | 0.23 | 4.36 | Zingiberis Rhizoma |
| 77 | MOL002501 | [(1S)-3-[(E)-but-2-enyl]-2-methyl-4-oxo-1-cyclopent-2-enyl] (1R,3R)-3-[(E)-3-methoxy-2-methyl-3-oxoprop-1-enyl]-2,2-dimethylcyclopropane-1-carboxylate | 360.49 | 3.68 | 0 | 5 | 62.52 | 0.37 | -0.36 | 0.31 | 0.29 | 3.21 | Zingiberis Rhizoma, Asari Radix Et Rhizoma |
| 78 | MOL002514 | Sexangularetin | 316.28 | 1.76 | 4 | 7 | 62.86 | 0.31 | -0.5 | 0.3 | 0.32 | 15.19 | Zingiberis Rhizoma |
| 79 | MOL000358 | beta-sitosterol | 414.79 | 8.08 | 1 | 1 | 36.91 | 1.32 | 0.99 | 0.75 | 0.23 | 5.36 | Zingiberis Rhizoma, Phellodendri Chinrnsis Cortex, Panax Ginseng C. A. Mey., Cinnamomi Ramulus, Mume Fructus, Cinnamomi Ramulus, Zanthoxyli Pericarpium |
| 80 | MOL002211 | 11,14-eicosadienoic acid | 308.56 | 7.3 | 1 | 2 | 39.99 | 1.22 | 0.76 | 0.2 | 0.23 | 5.6 | Aconiti Lateralis Radix Praeparata |
| 81 | MOL002388 | Delphin_qt | 303.26 | 1.67 | 6 | 7 | 57.76 | 0.12 | -0.66 | 0.28 | 0.35 | 1.43 | Aconiti Lateralis Radix Praeparata |
| 82 | MOL002392 | Deltoin | 328.39 | 2.48 | 0 | 5 | 46.69 | 0.55 | -0.12 | 0.37 | 0.32 | 7.7 | Aconiti Lateralis Radix Praeparata |
| 83 | MOL002393 | Demethyldelavaine A | 700.91 | -0.12 | 4 | 13 | 34.52 | -0.69 | -1.19 | 0.18 | 0.23 | 26.05 | Aconiti Lateralis Radix Praeparata |
| 84 | MOL002394 | Demethyldelavaine B | 700.91 | -0.12 | 4 | 13 | 34.52 | -0.7 | -1.01 | 0.18 | 0.22 | 26.75 | Aconiti Lateralis Radix Praeparata |
| 85 | MOL002395 | Deoxyandrographolide | 334.5 | 3.02 | 2 | 4 | 56.3 | 0.18 | -0.49 | 0.31 | 0.27 | 2.79 | Aconiti Lateralis Radix Praeparata |
| 86 | MOL002397 | karakoline | 377.58 | -0.05 | 3 | 5 | 51.73 | 0.32 | -0.03 | 0.73 | 0.15 | 11.1 | Aconiti Lateralis Radix Praeparata |
| 87 | MOL002398 | Karanjin | 292.3 | 2.94 | 0 | 4 | 69.56 | 1.22 | 0.62 | 0.34 | 0.26 | 13.15 | Aconiti Lateralis Radix Praeparata |
| 88 | MOL002401 | Neokadsuranic acid B | 452.74 | 7.05 | 1 | 3 | 43.1 | 0.69 | -0.01 | 0.85 | 0.29 | 12.05 | Aconiti Lateralis Radix Praeparata |
| 89 | MOL002406 | 2,7-Dideacetyl-2,7-dibenzoyl-taxayunnanine F | 776.9 | 3.12 | 1 | 14 | 39.43 | -0.75 | -1.3 | 0.38 | 0.38 | 10.95 | Aconiti Lateralis Radix Praeparata |
| 90 | MOL002410 | benzoylnapelline | 463.67 | 3.12 | 2 | 5 | 34.06 | 0.19 | -0.38 | 0.53 | 0.31 | 15.72 | Aconiti Lateralis Radix Praeparata |
| 91 | MOL002415 | 6-Demethyldesoline | 453.64 | -1.97 | 4 | 8 | 51.87 | -0.26 | -0.57 | 0.66 | 0.12 | 13.14 | Aconiti Lateralis Radix Praeparata |
| 92 | MOL002416 | deoxyaconitine | 629.82 | 0.25 | 2 | 11 | 30.96 | -0.23 | -0.61 | 0.24 | 0.19 | 22.64 | Aconiti Lateralis Radix Praeparata |
| 93 | MOL002419 | (R)-Norcoclaurine | 271.34 | 2.57 | 4 | 4 | 82.54 | 0.63 | 0.03 | 0.21 | 0.34 | 3.85 | Aconiti Lateralis Radix Praeparata |
| 94 | MOL002421 | ignavine | 449.59 | 1.22 | 3 | 6 | 84.08 | -0.07 | -0.49 | 0.25 | 0.32 | 28.93 | Aconiti Lateralis Radix Praeparata |
| 95 | MOL002422 | isotalatizidine | 407.61 | -0.73 | 3 | 6 | 50.82 | -0.11 | -0.62 | 0.73 | 0.14 | 11.59 | Aconiti Lateralis Radix Praeparata |
| 96 | MOL002423 | jesaconitine | 675.85 | -0.99 | 3 | 13 | 33.41 | -0.44 | -1.16 | 0.19 | 0.19 | 26.06 | Aconiti Lateralis Radix Praeparata |
| 97 | MOL002433 | (3R,8S,9R,10R,13R,14S,17R)-3-hydroxy-4,4,9,13,14-pentamethyl-17-[(E,2R)-6-methyl-7-[(2R,3R,4S,5S,6R)-3,4,5-trihydroxy-6-[[(2R,3R,4S,5S,6R)-3,4,5-trihydroxy-6-(hydroxymethyl)oxan-2-yl]oxymethyl]oxan-2-yl]oxyhept-5-en-2-yl]-1,2,3,7,8,10,12,15,16,17-decahydr | 781.1 | 2.2 | 8 | 13 | 41.52 | -2.31 | -3.18 | 0.22 | 0.25 | 10.51 | Aconiti Lateralis Radix Praeparata |
| 98 | MOL002434 | Carnosifloside I_qt | 456.78 | 5.69 | 2 | 3 | 38.16 | 0.28 | -0.77 | 0.8 | 0.25 | 7 | Aconiti Lateralis Radix Praeparata |
| 99 | MOL000359 | sitosterol | 414.79 | 8.08 | 1 | 1 | 36.91 | 1.32 | 0.87 | 0.75 | 0.22 | 5.37 | Aconiti Lateralis Radix Praeparata, Cinnamomi Ramulus, Zingiberis Rhizoma |
| 100 | MOL000538 | hypaconitine | 615.79 | -0.1 | 2 | 11 | 31.39 | -0.34 | -0.78 | 0.26 | 0.21 | 19.87 | Aconiti Lateralis Radix Praeparata |
| 101 | MOL013271 | Kokusaginin | 259.28 | 2.33 | 0 | 5 | 66.68 | 0.95 | 0.67 | 0.2 | 0.17 | -3.19 | Zanthoxyli Pericarpium |
| 102 | MOL002881 | Diosmetin | 300.28 | 2.32 | 3 | 6 | 31.14 | 0.46 | -0.66 | 0.27 | 0.34 | 16.34 | Zanthoxyli Pericarpium |

Supplementary Table 2 Common targets

| **Number** | **Targets** |
| --- | --- |
| 1 | ABCG2 |
| 2 | ACHE |
| 3 | ADCYAP1 |
| 4 | ADH1C |
| 5 | ADRA1A |
| 6 | ADRA1B |
| 7 | ADRA1D |
| 8 | ADRA2A |
| 9 | ADRA2B |
| 10 | ADRA2C |
| 11 | ADRB1 |
| 12 | ADRB2 |
| 13 | AHR |
| 14 | AKR1B1 |
| 15 | AKR1C3 |
| 16 | AKT1 |
| 17 | ALOX5 |
| 18 | APOB |
| 19 | AR |
| 20 | BAG3 |
| 21 | BAX |
| 22 | BCL2 |
| 23 | BCL2L1 |
| 24 | BIRC5 |
| 25 | CA2 |
| 26 | CACNA1S |
| 27 | CALM1 |
| 28 | CASP1 |
| 29 | CASP3 |
| 30 | CASP8 |
| 31 | CASP9 |
| 32 | CAT |
| 33 | CAV1 |
| 34 | CCL2 |
| 35 | CCNA2 |
| 36 | CCNB1 |
| 37 | CCND1 |
| 38 | CD40LG |
| 39 | CDK1 |
| 40 | CDK2 |
| 41 | CDKN1A |
| 42 | CDKN2A |
| 43 | CHEK1 |
| 44 | CHEK2 |
| 45 | CHRM1 |
| 46 | CHRM2 |
| 47 | CHRM3 |
| 48 | CHRNA2 |
| 49 | CHRNA7 |
| 50 | CHUK |
| 51 | CLDN4 |
| 52 | COL1A1 |
| 53 | COL3A1 |
| 54 | CRP |
| 55 | CTSD |
| 56 | CXCL10 |
| 57 | CXCL11 |
| 58 | CXCL2 |
| 59 | CXCL8 |
| 60 | CYP1A1 |
| 61 | CYP1A2 |
| 62 | CYP1B1 |
| 63 | CYP3A4 |
| 64 | DPEP1 |
| 65 | DPP4 |
| 66 | DRD1 |
| 67 | DRD3 |
| 68 | DRD5 |
| 69 | DUOX2 |
| 70 | E2F1 |
| 71 | ECE1 |
| 72 | EGF |
| 73 | EGFR |
| 74 | EIF6 |
| 75 | ELK1 |
| 76 | ERBB2 |
| 77 | ERBB3 |
| 78 | ESR1 |
| 79 | ESR2 |
| 80 | F10 |
| 81 | F2 |
| 82 | F3 |
| 83 | F7 |
| 84 | FOS |
| 85 | G6PD |
| 86 | GABRA2 |
| 87 | GABRA6 |
| 88 | GJA1 |
| 89 | GSTM1 |
| 90 | GSTP1 |
| 91 | HADHB |
| 92 | HAS2 |
| 93 | HIF1A |
| 94 | HMOX1 |
| 95 | HSF1 |
| 96 | HSP90AA1 |
| 97 | HSPA5 |
| 98 | HSPB1 |
| 99 | HTR2A |
| 100 | HTR2C |
| 101 | HTR3A |
| 102 | ICAM1 |
| 103 | IFNG |
| 104 | IGFBP3 |
| 105 | IKBKB |
| 106 | IL10 |
| 107 | IL1A |
| 108 | IL1B |
| 109 | IL2 |
| 110 | IL4 |
| 111 | IL6 |
| 112 | INSR |
| 113 | IRF1 |
| 114 | JUN |
| 115 | KCNMA1 |
| 116 | KDR |
| 117 | LTA4H |
| 118 | MAOA |
| 119 | MAOB |
| 120 | MAP2K4 |
| 121 | MAPK1 |
| 122 | MAPK8 |
| 123 | MMP1 |
| 124 | MMP2 |
| 125 | MMP3 |
| 126 | MMP9 |
| 127 | MPO |
| 128 | MYC |
| 129 | NCF1 |
| 130 | NCOA1 |
| 131 | NCOA2 |
| 132 | NFE2L2 |
| 133 | NFKBIA |
| 134 | NOS2 |
| 135 | NOS3 |
| 136 | NOX1 |
| 137 | NPEPPS |
| 138 | NQO1 |
| 139 | NR1I2 |
| 140 | NR3C1 |
| 141 | NR3C2 |
| 142 | ODC1 |
| 143 | OPRD1 |
| 144 | OPRM1 |
| 145 | PARP1 |
| 146 | PDE10A |
| 147 | PDE3A |
| 148 | PGR |
| 149 | PIK3CG |
| 150 | PIM1 |
| 151 | PLAT |
| 152 | PLAU |
| 153 | PON1 |
| 154 | POR |
| 155 | PPARA |
| 156 | PPARD |
| 157 | PPARG |
| 158 | PRKACA |
| 159 | PRKCA |
| 160 | PRKCB |
| 161 | PRSS1 |
| 162 | PSMD3 |
| 163 | PTEN |
| 164 | PTGER3 |
| 165 | PTGS1 |
| 166 | PTGS2 |
| 167 | PTPN1 |
| 168 | RAF1 |
| 169 | RB1 |
| 170 | RELA |
| 171 | RUNX2 |
| 172 | RXRB |
| 173 | SCN5A |
| 174 | SELE |
| 175 | SERPINE1 |
| 176 | SLC6A2 |
| 177 | SLC6A3 |
| 178 | SLC6A4 |
| 179 | SLPI |
| 180 | SOD1 |
| 181 | SPP1 |
| 182 | STAT1 |
| 183 | TGFB1 |
| 184 | THBD |
| 185 | TNF |
| 186 | TOP2A |
| 187 | TP53 |
| 188 | UGT1A1 |
| 189 | VCAM1 |
| 190 | VEGFA |
| 191 | XDH |
